# Supplementary material for: Residue Depletion Profile and Estimation of Withdrawal Period for Sulfadimethoxine and Ormetoprim in Edible Tissues of Nile Tilapia (Oreochromis sp.) on Medicated Feed
Source: MDPI journal article supplement (doi:10.3390/ani13152499), 2023-08-03
Supplement: s1 [file s1]

## SUPPLEMENTARY MATERIALS

### Residue depletion profile and estimation of withdrawal period for sulfadimethoxine and ormetoprim in edible tissues of Nile tilapia (*Oreochromis* sp.) on medicated feed

Lucas Victor Pereira de Freitas<sup>1,†</sup>, Carlos Augusto Alvarenga da Mota Júnior<sup>1,†</sup>, Marina Alves Damaceno<sup>1</sup>, Juliana Grell Fernandes Silveira<sup>1</sup>, Ana Carolina Velloso Portela<sup>1</sup>, Sarah Chagas Campanharo<sup>1</sup>, Agnaldo Fernando Baldo da Silva<sup>1</sup>, Inácio Mateus Assane<sup>2</sup>, Fabiana Pilarski<sup>2</sup>, James Jacob Sasanya<sup>3</sup>, and Jonas Augusto Rizzato Paschoal<sup>1,\*</sup>

<sup>1</sup> School of Pharmaceutical Sciences of Ribeirão Preto, Department of Biomolecular Sciences, University of São Paulo (USP), Ribeirão Preto, SP 14040-900, Brazil

<sup>2</sup> Laboratory of Microbiology and Parasitology of Aquatic Organisms, São Paulo State University (Unesp), Aquaculture Center of Unesp, Jaboticabal, SP 14884-900, Brazil

<sup>3</sup> International Atomic Energy Agency, Vienna A-1400, Austria.

\* Correspondence: paschoal@usp.br

† These authors contributed equally to this work

**Table S1.** The selected reaction monitoring (SRM) acquisition parameters for monitoring the target analytes.

| Analyte | Molecular formula                                               | Precursor ion (m/z) | Monitored transitions  | Cone voltage (V) | Collision energy (eV) |
|---------|-----------------------------------------------------------------|---------------------|------------------------|------------------|-----------------------|
| SDM     | C <sub>12</sub> H <sub>14</sub> N <sub>4</sub> O <sub>4</sub> S | 311                 | 311 > 156 <sup>1</sup> | 55               | 35                    |
|         |                                                                 |                     | 311 > 245 <sup>2</sup> | 55               | 35                    |
| OMP     | C <sub>14</sub> H <sub>18</sub> N <sub>4</sub> O <sub>2</sub>   | 275                 | 275 > 259 <sup>1</sup> | 35               | 30                    |
|         |                                                                 |                     | 275 > 123 <sup>2</sup> | 35               | 21                    |
| IS      | C <sub>10</sub> H <sub>11</sub> N <sub>3</sub> O <sub>3</sub> S | 254                 | 254 > 156 <sup>1</sup> | 60               | 40                    |
|         |                                                                 |                     | 254 > 98 <sup>2</sup>  | 60               | 52                    |

<sup>1</sup> Quantifier transition; <sup>2</sup> qualifier transition

SDM = sulfadimethoxine; OMP = ormetoprim; IS = Internal standard (sulfamethoxazole)

**Table S2.** Parameters of evaluation to assess the reliability of the analytical method for determination of SDM and OMP in fish feed.

| Parameter                                             | OMP           | SDM           |
|-------------------------------------------------------|---------------|---------------|
| Linear range ( $\mu\text{g mL}^{-1}$ )                | 0.2 – 1.0     | 1.0 – 5.0     |
| Linearity (r)                                         | 0.9952 – 1.00 | 0.9981 – 1.00 |
| Intra-day precision (CV, %, n = 3)                    |               |               |
| OMP = 0.4; SDM = 2.0 ( $\mu\text{g mL}^{-1}$ , n = 3) | 0.7           | 1.2           |
| OMP = 0.6; SDM = 3.0 ( $\mu\text{g mL}^{-1}$ , n = 3) | 2.2           | 0.9           |
| OMP = 0.8; SDM = 4.0 ( $\mu\text{g mL}^{-1}$ , n = 3) | 1.0           | 1.3           |
| Inter-days precision (CV, %, n = 3)                   |               |               |
| OMP = 0.4; SDM = 2.0 ( $\mu\text{g mL}^{-1}$ , n = 3) | 2.2           | 1.8           |
| OMP = 0.6; SDM = 3.0 ( $\mu\text{g mL}^{-1}$ , n = 3) | 2.4           | 1.8           |
| OMP = 0.8; SDM = 4.0 ( $\mu\text{g mL}^{-1}$ , n = 3) | 2.3           | 0.8           |
| Intra-day trueness (recovery, %, n = 3)               |               |               |
| OMP = 0.4; SDM = 2.0 ( $\mu\text{g mL}^{-1}$ , n = 3) | 100.2         | 99.1          |
| OMP = 0.6; SDM = 3.0 ( $\mu\text{g mL}^{-1}$ , n = 3) | 102.5         | 101.1         |
| OMP = 0.8; SDM = 4.0 ( $\mu\text{g mL}^{-1}$ , n = 3) | 101.9         | 100.2         |
| Inter-day trueness (recovery, %, n = 3)               |               |               |
| OMP = 0.4; SDM = 2.0 ( $\mu\text{g mL}^{-1}$ , n = 3) | 98.7          | 100.2         |
| OMP = 0.6; SDM = 3.0 ( $\mu\text{g mL}^{-1}$ , n = 3) | 102.9         | 102.1         |
| OMP = 0.8; SDM = 4.0 ( $\mu\text{g mL}^{-1}$ , n = 3) | 101.7         | 100.7         |

SDM = sulfadimethoxine; OMP = ormetoprim; CV = coefficient of variation;

**Table S3.** Parameters of evaluation to assess the reliability of the analytical method for determination of SDM and OMP in fish fillet.

| Parameter                                             | OMP          | SDM          |
|-------------------------------------------------------|--------------|--------------|
| Linear range ( $\text{ng g}^{-1}$ )                   | 20.0 – 260   | 20.0 – 260   |
| Linearity (r)                                         | 0.997 – 0.99 | 0.996 – 1.00 |
| Intra-day precision (CV, %, n = 3)                    |              |              |
| 20 ( $\text{ng g}^{-1}$ , n = 3)                      | 2.3          | 8.4          |
| 140 ( $\text{ng g}^{-1}$ , n = 3)                     | 3.6          | 3.8          |
| 260 ( $\text{ng g}^{-1}$ , n = 3)                     | 0.8          | 1.9          |
| Inter-days precision (CV, %, n = 3)                   |              |              |
| 20 ( $\text{ng g}^{-1}$ , n = 3)                      | 2.5          | 5.1          |
| 140 ( $\text{ng g}^{-1}$ , n = 3)                     | 0.9          | 3.3          |
| 260 ( $\text{ng g}^{-1}$ , n = 3)                     | 0.9          | 4.7          |
| Trueness (recovery, %, n = 3)                         |              |              |
| OMP = 0.4; SDM = 2.0 ( $\mu\text{g mL}^{-1}$ , n = 3) | 107          | 85.0         |
| OMP = 0.6; SDM = 3.0 ( $\mu\text{g mL}^{-1}$ , n = 3) | 95.0         | 106          |
| OMP = 0.8; SDM = 4.0 ( $\mu\text{g mL}^{-1}$ , n = 3) | 101          | 99.0         |
| LOD ( $\text{ng/g}$ , n = 3)                          | 1.0          | 3.0          |
| LOQ ( $\text{ng/g}$ , n = 3)                          | 20.0         | 20.0         |
| LOQ precision (CV, %, n = 3)                          | 2.3          | 8.4          |
| LOQ trueness (recovery, %, n = 3)                     | 107.2        | 85.4         |

SDM = sulfadimethoxine; OMP = ormetoprim; CV = coefficient of variation; LOD = limit of detection; LOQ = limit of quantification

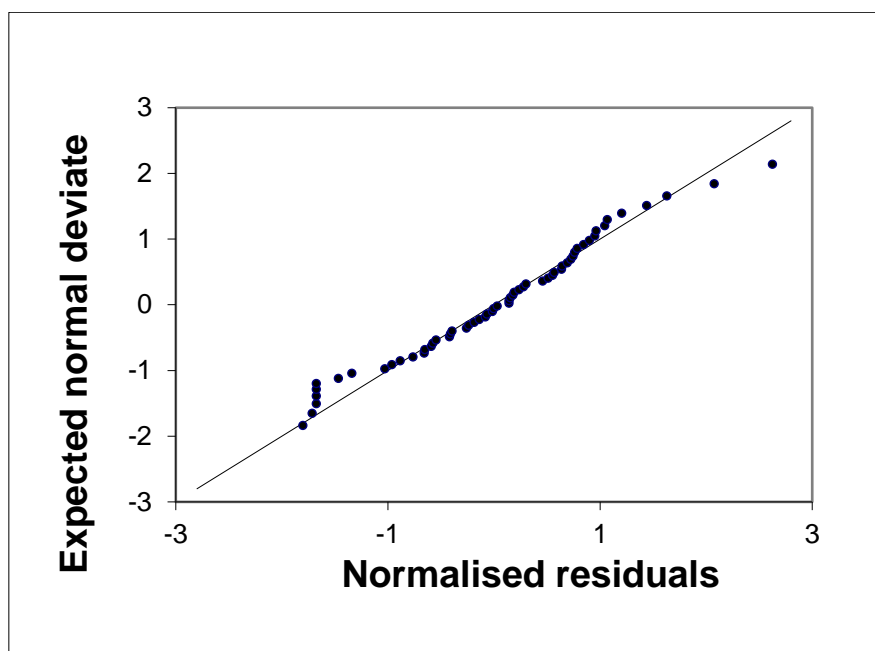

Fig. S1. Graph of the ordered normalized residuals versus their cumulative frequency, prepared on a normal probability scale.
